# Supplementary material
Source: MDPI journal article supplement (https://www.mdpi.com/2504-5377/7/1/2)
Supplement: s1 [file s1]

# Interplay of Interfacial and Rheological Properties on Drainage Reduction in CO<sub>2</sub> Foam Stabilised by Surfactant/Nanoparticle Mixtures in Brine

Beatriz Ribeiro Souza de Azevedo <sup>1,2</sup>, Bruno Giordano Alvarenga <sup>1</sup>, Ana Maria Percebom <sup>2</sup> and Aurora Pérez-Gramatges <sup>1,2\*</sup>

<sup>1</sup> Laboratory of Physical-Chemistry of Surfactants (LASURF), Pontifical Catholic University of Rio de Janeiro, Rio de Janeiro 22451-900, Brazil

<sup>2</sup> Department of Chemistry, Pontifical Catholic University of Rio de Janeiro, Rio de Janeiro 22451-900, Brazil

\* Correspondence: aurora@puc-rio.br

**Table S1.** pH of the surfactant/NPs combinations after CO<sub>2</sub> saturation

|      | NP                             | Without NP | 0.5 wt. % | 1.0 wt. % |
|------|--------------------------------|------------|-----------|-----------|
| SDS  | SiO <sub>2</sub>               | 4.8        | 4.8       | 4.9       |
|      | Al <sub>2</sub> O <sub>3</sub> |            | 5.1       | 5.6       |
| DTAB | SiO <sub>2</sub>               | 5.0        | 5.0       | 5.0       |
|      | Al <sub>2</sub> O <sub>3</sub> |            | 5.0       | 5.0       |
| CAPB | SiO <sub>2</sub>               | 4.7        | 4.8       | 4.9       |
|      | Al <sub>2</sub> O <sub>3</sub> |            | 5.0       | 5.2       |

**Table S2.**  $\zeta$ -potentials of NPs in brine and surfactant solutions (standard deviation < 2 mV).

| NP                                   | $\zeta$ (mV) |
|--------------------------------------|--------------|
| SiO <sub>2</sub>                     | -10          |
| SiO <sub>2</sub> /DTAB               | +20          |
| SiO <sub>2</sub> /SDS                | -14          |
| SiO <sub>2</sub> /CAPB               | -15          |
| Al <sub>2</sub> O <sub>3</sub>       | +23          |
| Al <sub>2</sub> O <sub>3</sub> /DTAB | +23          |
| Al <sub>2</sub> O <sub>3</sub> /SDS  | -33          |
| Al <sub>2</sub> O <sub>3</sub> /CAPB | -15          |

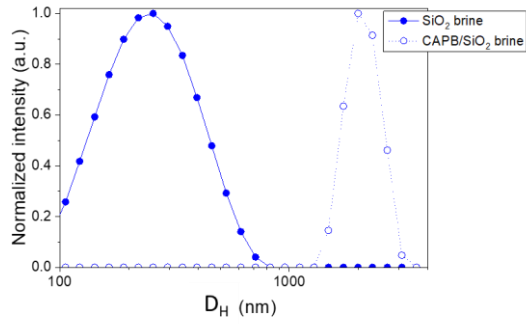

(a)

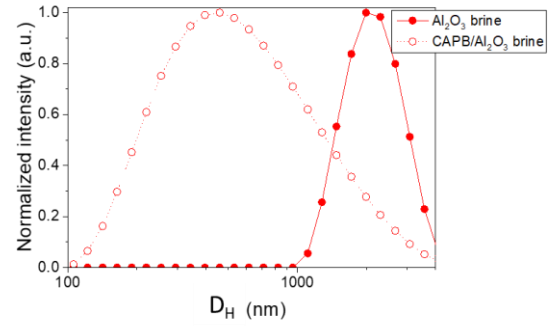

(b)

**Figure S1.** Hydrodynamic diameter ( $D_H$ ) of (a)  $\text{SiO}_2$  and (b)  $\text{Al}_2\text{O}_3$  NPs in brine and in CAPB solutions

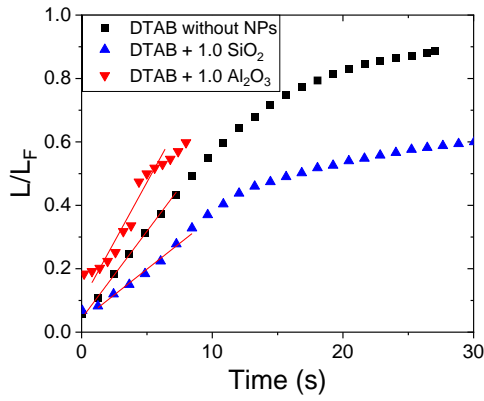

(a)

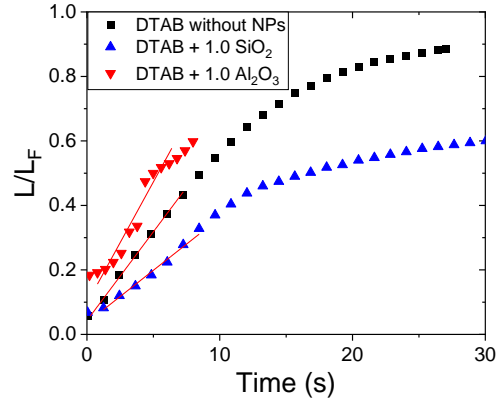

(b)

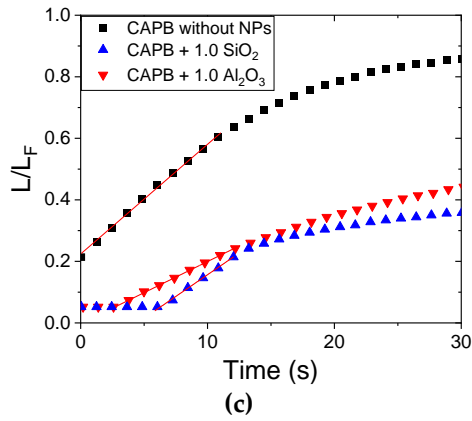

(c)

**Figure S2.** Drainage curves of  $\text{CO}_2$ -foams formed with (a) DTAB, (b) SDS, and (c) CAPB, in the absence and presence of NPs. Slope of the linear fits (red lines) represents the initial drainage rate ( $DR_i$ ).
